# Supplementary material for: Lack of Documented Prophylactic Vitamin K Administration in Newborns: Incidence, Predictors, and Bleeding Outcomes in a Large Healthcare Network Population
Source: Research Square preprint supplement (doi:10.21203/rs.3.rs-8672108/v1), 2026-01-29

**Supplemental Figure 4. Association Between Clinicodemographics and All Bleeding (Females Only)**


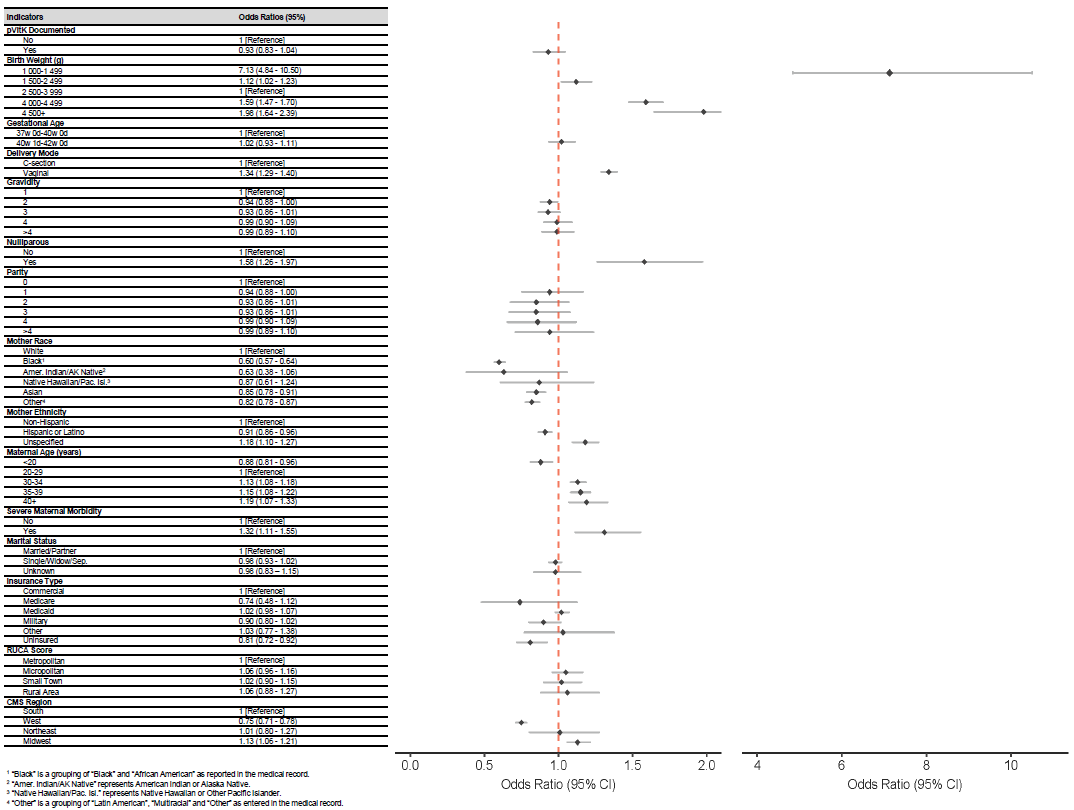

Supplement: Supplementary file 1 [file 00a64602378325b25b5360b0.docx]
