# Supplementary material for: Lack of Documented Prophylactic Vitamin K Administration in Newborns: Incidence, Predictors, and Bleeding Outcomes in a Large Healthcare Network Population
Source: Research Square preprint supplement (doi:10.21203/rs.3.rs-8672108/v1), 2026-01-29
Supplement: Supplementary file 3 [file 36c611988ba24f957a731a2e.docx]

**Supplemental Table 1.** Vermont Oxford Network (VON) Anomalies & Major Malformations

| **ICD-10 Code** | **Anomaly/Malformation** |
| --- | --- |
| D48.0 | Sacrococcygeal teratoma requiring surgical/medical intervention |
| D56.0 | Alpha thalassemia - hemoglobin barts |
| G71.11 or G71.0 | Myotonic dystrophy |
| P02.3 | Twin-twin transfusion syndrome |
| P09.1 | Inborn error of metabolism |
| P56.90, P56.99 | Hemolytic related hydrops fetalis |
| P83.2 | Hydrops fetalis non-hemolytic |
| Q32.1 | Tracheal agenesis or atresia |
| Q33.0 | Congenital cystic adenomatoid malformation of the lung |
| Q35.1- Q35.9, Q37.1- Q37.9 | Cleft lip and palate |
| Q39.0 | Esophageal atresia without fistula |
| Q39.1 | Esophageal atresia with tracheo-esophageal fistula |
| Q39.2 | Tracheo-esophageal fistula without atresia |
| Q41.0 | Duodenal atresia |
| Q41.1 | Jejunal atresia |
| Q41.2 | Ileal atresia |
| Q41.9 | Small bowel atresia, part unspecified |
| Q42.0 | Atresia of large bowel or rectum |
| Q42.3 | Imperforate anus |
| Q43.1 | Hirschsprung’s disease requiring surgical or medical intervention |
| Q43.3 | Malrotation |
| Q44.2 | Biliary atresia |
| Q60.6 | Oligohydramnios sequence |
| Q61.11- Q61.3 | Bilateral renal agenesis |
| Q61.4 | Bilateral polycystic, multicystic, or dysplastic kidneys |
| Q64.12 | Exstrophy of the urinary bladder |
| Q77.1 | Thanatophoric dysplasia types 1 and 2 |
| Q79.0 | Congenital diaphragmatic hernia |
| Q79.2 | Omphalocele |
| Q79.3 | Gastroschisis |
| Q89.4 | Conjoined twins |
| Q90.0, Q90.1, Q90.2 | Trisomy 21 |
| Q91.0, Q91.1, Q91.2, Q91.3 | Trisomy 18 |
| Q91.4, Q91.5, Q91.6, Q91.7 | Trisomy 13 |
| Q92.7 | Triploidy |
