# Supplementary material for: Lack of Documented Prophylactic Vitamin K Administration in Newborns: Incidence, Predictors, and Bleeding Outcomes in a Large Healthcare Network Population
Source: Research Square preprint supplement (doi:10.21203/rs.3.rs-8672108/v1), 2026-01-29
Supplement: Supplementary file 5 [file 7a1e3fb39f25f5c8e4a23688.docx]

**Supplemental Table 3. ICD-10 codes used to define bleeding diagnoses in the newborn.**

| **ICD-10 Code** | **Diagnosis** | **VKDB** | **sVKDB** | **All Bleeding** |
| --- | --- | --- | --- | --- |
| P53 | Hemorrhagic disease of newborn | X | X | X |
| P54.1 | Neonatal melena |  | X | X |
| P58.0 | Neonatal jaundice due to bruising |  | X | X |
| P51.9 | Umbilical hemorrhage of newborn, unspecified |  | X | X |
| P54.6 | Neonatal vaginal hemorrhage |  | X | X |
| P54.0 | Neonatal hematemesis |  | X | X |
| P54.2 | Neonatal rectal hemorrhage |  | X | X |
| P54.8 | Other specified neonatal hemorrhages |  | X | X |
| I61.9 | Nontraumatic intracerebral hemorrhage, unspecified |  | X | X |
| P52.8 | Other intracranial (nontraumatic) hemorrhages of newborn |  | X | X |
| P54.3 | Other neonatal gastrointestinal hemorrhage |  | X | X |
| P51.8 | Other umbilical hemorrhages of newborn |  | X | X |
| P54.5 | Neonatal cutaneous hemorrhage |  | X | X |
| P52.3 | Unspecified intraventricular (nontraumatic) hemorrhage of newborn |  | X | X |
| P61.6 | Other transient neonatal disorders of coagulation |  | X | X |
| P52.5 | Subarachnoid (nontraumatic) hemorrhage of newborn |  | X | X |
| P522.2 | Intraventricular (nontraumatic) hemorrhage, grade 4, of newborn |  | X | X |
| P52.0 | Intraventricular (nontraumatic) hemorrhage, grade 1, of newborn |  | X | X |
| P52.6 | Cerebellar (nontraumatic) and posterior fossa hemorrhage of newborn |  | X | X |
| P522.1 | Intraventricular (nontraumatic) hemorrhage, grade 3, of newborn |  | X | X |
| I61.1 | Nontraumatic intracerebral hemorrhage in hemisphere, cortical |  | X | X |
| P54.9 | Neonatal hemorrhage, unspecified |  | X | X |
| D68.9 | Coagulation defect, unspecified |  | X | X |
| P61.8 | Other specified perinatal hematological disorders |  | X | X |
| P58.1 | Neonatal jaundice due to bleeding |  | X | X |
| I61.5 | Nontraumatic intracerebral hemorrhage, intraventricular |  | X | X |
| P52.9 | Intracranial (nontraumatic) hemorrhage of newborn, unspecified |  | X | X |
| P52.1 | Intraventricular (nontraumatic) hemorrhage, grade 2, of newborn |  | X | X |
| P52.4 | Intracerebral (nontraumatic) hemorrhage of newborn |  | X | X |
| P12.0 | Cephalhematoma due to birth injury |  |  | X |
| P54.4 | Neonatal adrenal hemorrhage |  |  | X |
| P61.0 | Transient neonatal thrombocytopenia |  |  | X |
| P12.89 | Other birth injuries to scalp |  |  | X |
| P10.2 | Intraventricular hemorrhage due to birth injury |  |  | X |
| P50.9 | Newborn affected by intrauterine (fetal) blood loss, unspecified |  |  | X |
| P15.8 | Other specified birth injuries |  |  | X |
| P12.3 | Bruising of scalp due to birth injury |  |  | X |
| P12.2 | Epicranial subaponeurotic hemorrhage due to birth injury |  |  | X |
| P10.3 | Subarachnoid hemorrhage due to birth injury |  |  | X |
| P50.4 | Newborn affected by hemorrhage into maternal circulation |  |  | X |
| P10.0 | Subdural hemorrhage due to birth injury |  |  | X |
| P50.0 | Newborn affected by intrauterine (fetal) blood loss from vasa previa |  |  | X |
| P50.1 | Newborn affected by intrauterine (fetal) blood loss from ruptured cord |  |  | X |
| P50.8 | Newborn affected by other intrauterine (fetal) blood loss |  |  | X |
