# Supplementary material for: Lack of Documented Prophylactic Vitamin K Administration in Newborns: Incidence, Predictors, and Bleeding Outcomes in a Large Healthcare Network Population
Source: Research Square preprint supplement (doi:10.21203/rs.3.rs-8672108/v1), 2026-01-29
Supplement: Supplementary file 6 [file cfee2e486004b1069a54d848.docx]

**Supplemental Table 2.** Inherited Bleeding Disorders

| **ICD-10 Code** | **Inherited Bleeding Disorder** |
| --- | --- |
| D66 | Hereditary factor VIII deficiency |
| D67 | Hereditary factor IX deficiency |
| D68.00 | Von Willebrand disease, unspecified |
| D68.01 | Von Willebrand disease, type 1 |
| D68.03 | Von Willebrand disease, type 3 |
| D68.09 | Other von Willebrand disease |
| D68.021 | Von Willebrand disease, type 2B |
| D68.022 | Von Willebrand disease, type 2M |
| D68.023 | Von Willebrand disease, type 2N |
| D68.029 | Von Willebrand disease, type 2, unspecified |
| D68.1 | Hereditary factor XI deficiency |
| I78.0 | Hereditary hemorrhagic telangiectasia |
