# Supplementary figures and images for: Lack of Documented Prophylactic Vitamin K Administration in Newborns: Incidence, Predictors, and Bleeding Outcomes in a Large Healthcare Network Population
Source: Research Square preprint supplement (doi:10.21203/rs.3.rs-8672108/v1), 2026-01-29

**Supplemental Figure 2. Association Between Clinicodemographics and All Bleeding**

**
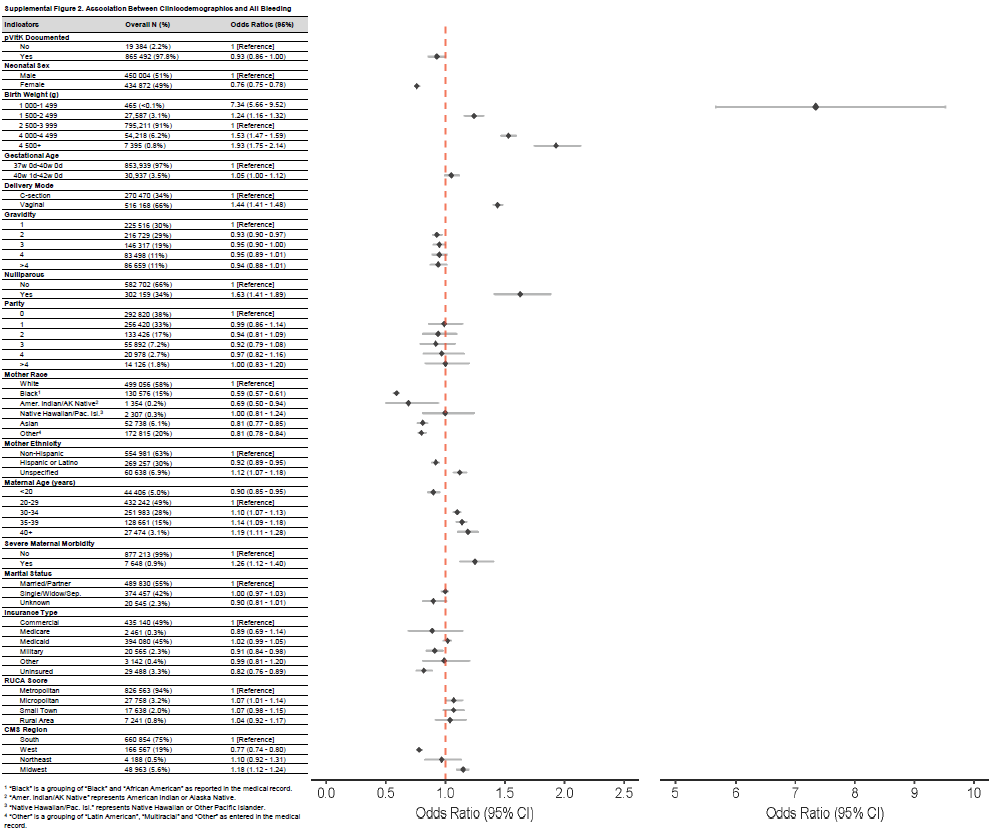
**

Supplement: Supplementary file 2 [file 18ddc6b8d9197350845fe126.docx]

**Supplemental Figure 3. Association Between Clinicodemographics and All Bleeding (Males Only)**


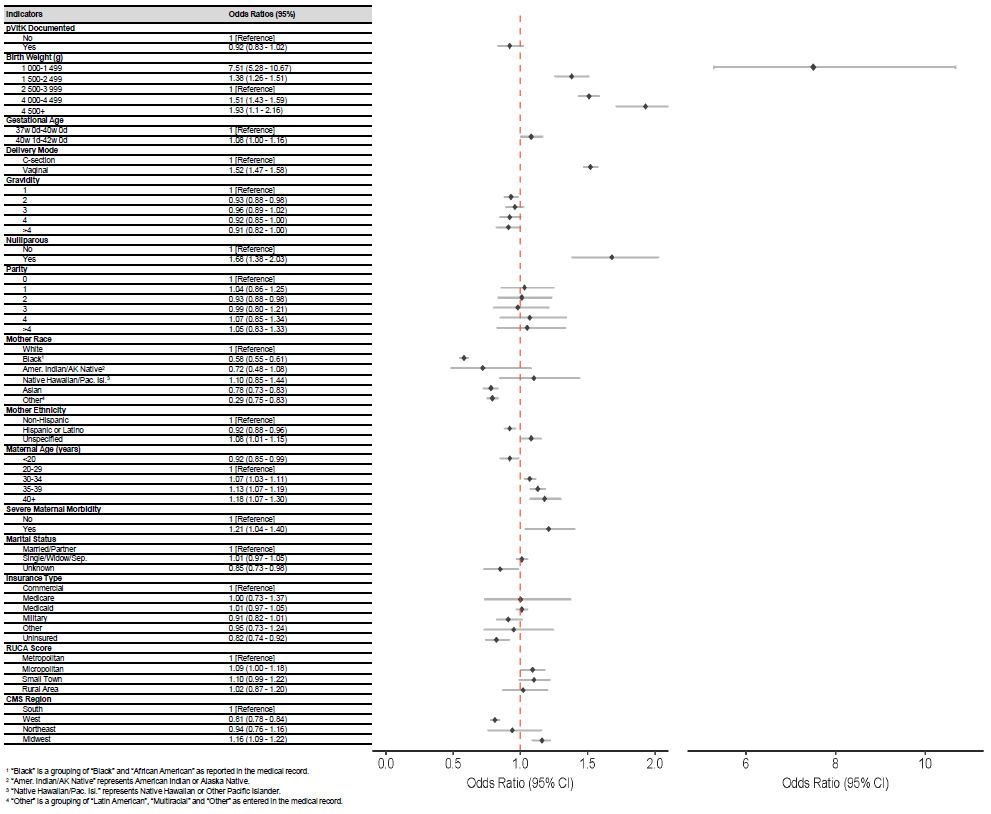

Supplement: Supplementary file 4 [file 4c1c244b1d19f7503b1ec315.docx]

**Supplemental Figure 1:** Timing of Vitamin K Administration


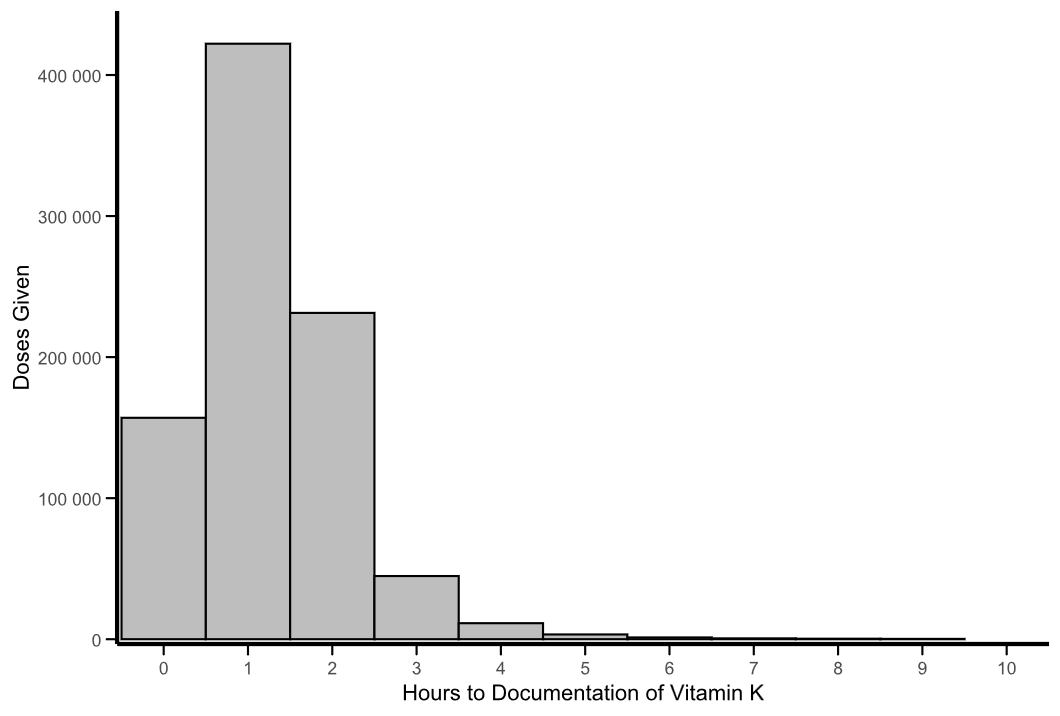

Supplement: Supplementary file 7 [file f82b90710b4b35b40a589413.docx]
